# Supplementary material
Source: PubMed Central journal article supplement (PMC3685260)
Supplement: AEM.00238-13_zam999104381so1.pdf [file AEM.00238-13_zam999104381so1.pdf]

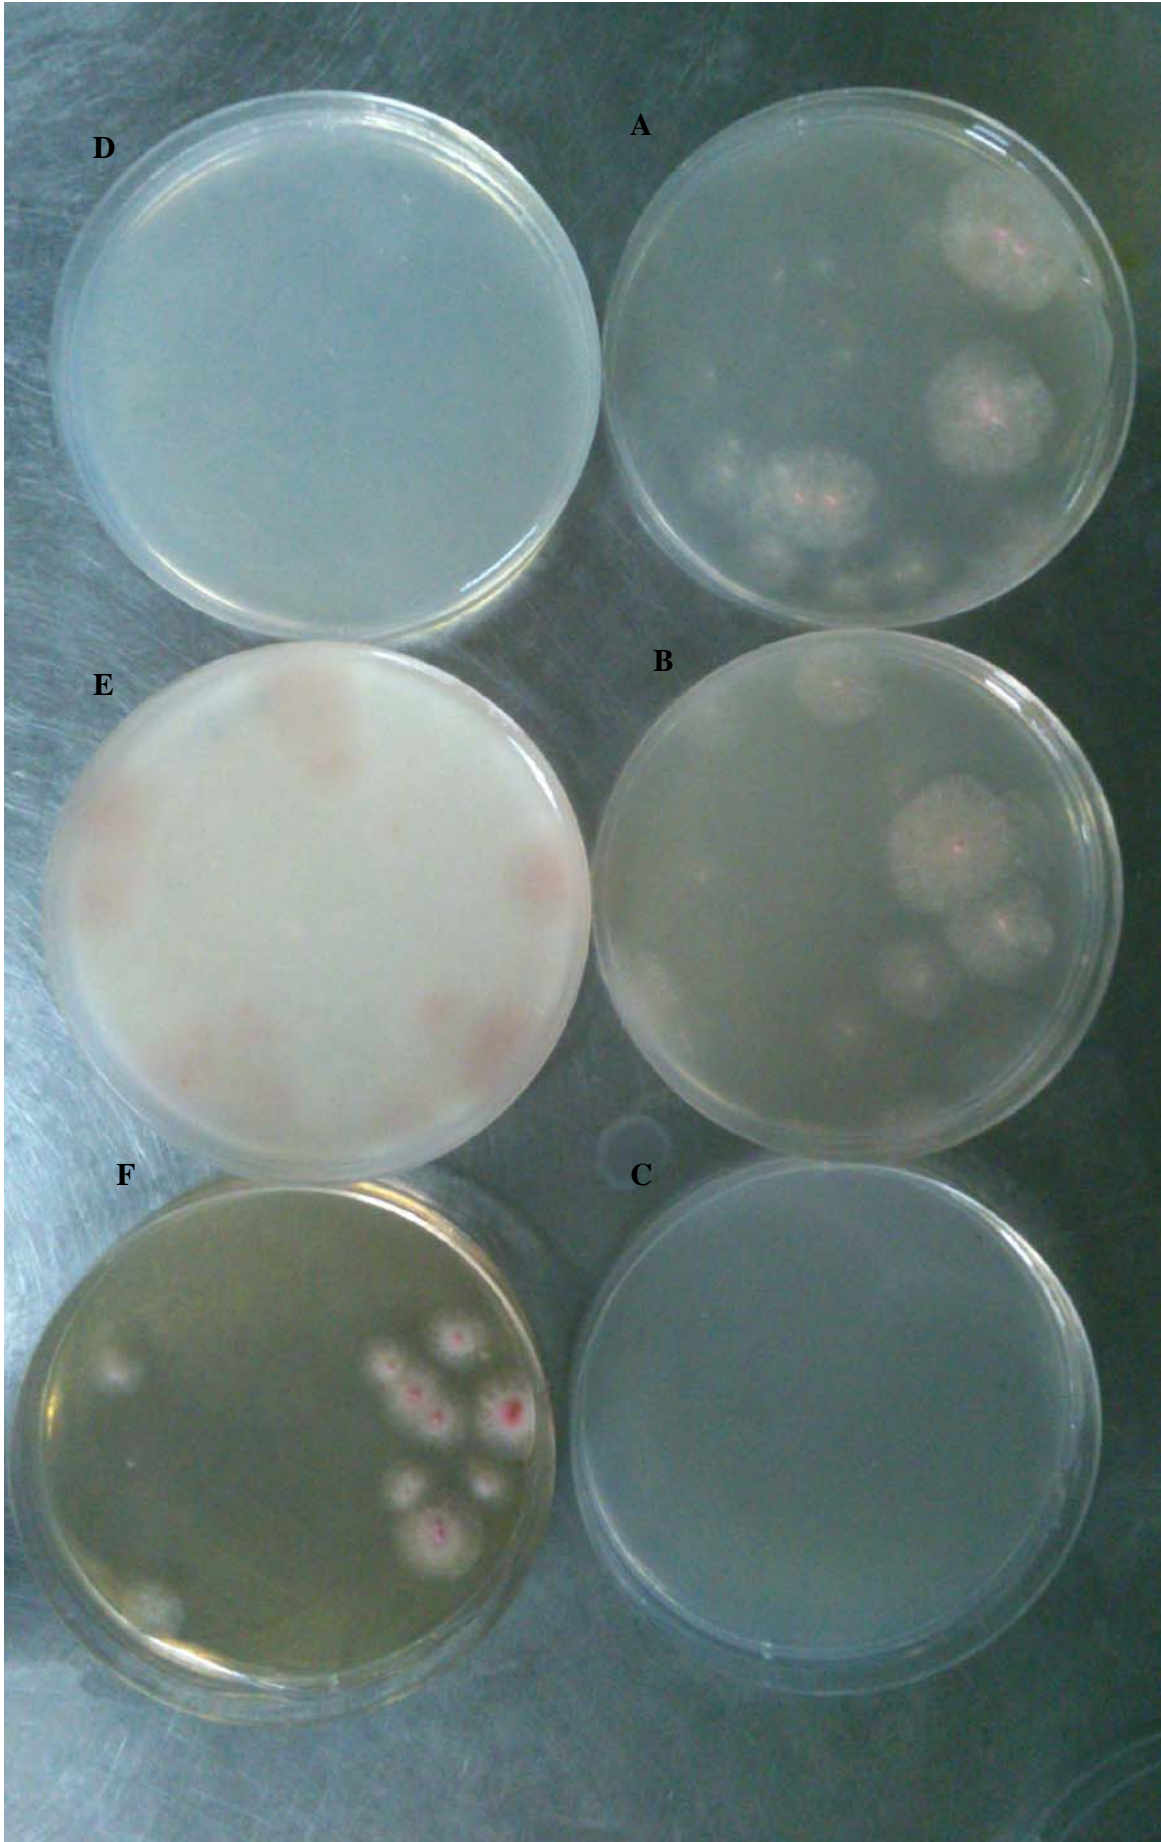

Figure S1. The growth phenotypes of *M. alpina* grown on medium containing glucose (A), phenylalanine (B), phenylacetate (C), phenylalanine and p-chlorophenylalanine (D), tyrosine (E), or glucose and phenylalanine (F) as the carbon source. The data shown are the results of three independent experiments.

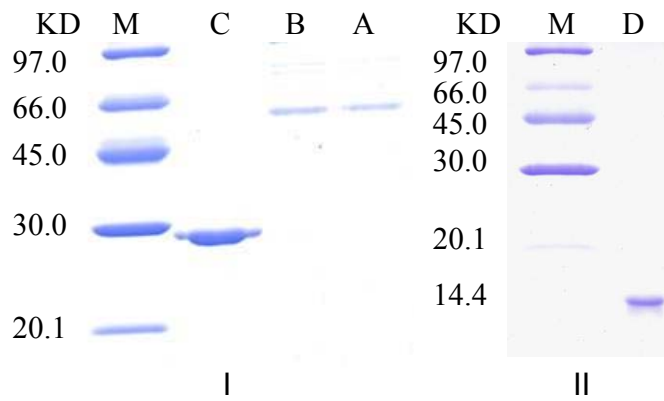

Fig. S2. SDS-polyacrylamide gel electrophoresis. The protein patterns are: (A) PAH-1; (B) PAH-2; (C) DHPR; (D) PCD; Proteins were denatured at 100°C for 5 min in 0.1% SDS and 1% 2-mercaptoethanol before being loaded in a 5% (wt/vol) stacking gel and separated in a 12% (I) or 15% (II) (wt/vol) separation gel. The gel was stained with coomassie bright blue R250. The molecular weight markers from GE Healthcare are indicated at each side of the panel.

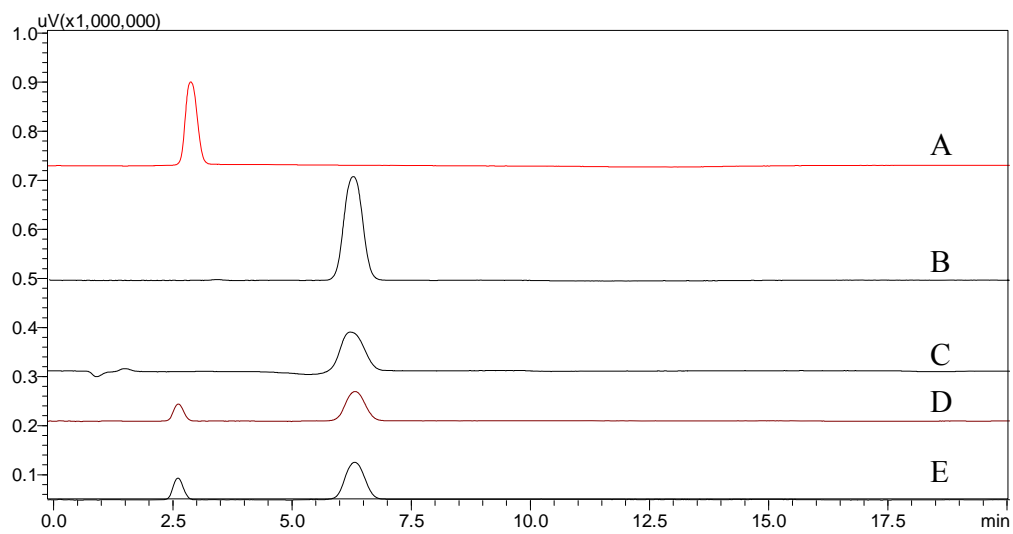

Figure S3. HPLC chromatographs of the reaction products: Tyrosine standard (A); Phenylalanine standard (B); Blank reaction (C); PAH-1 reaction (D); PAH-2 reaction (E).

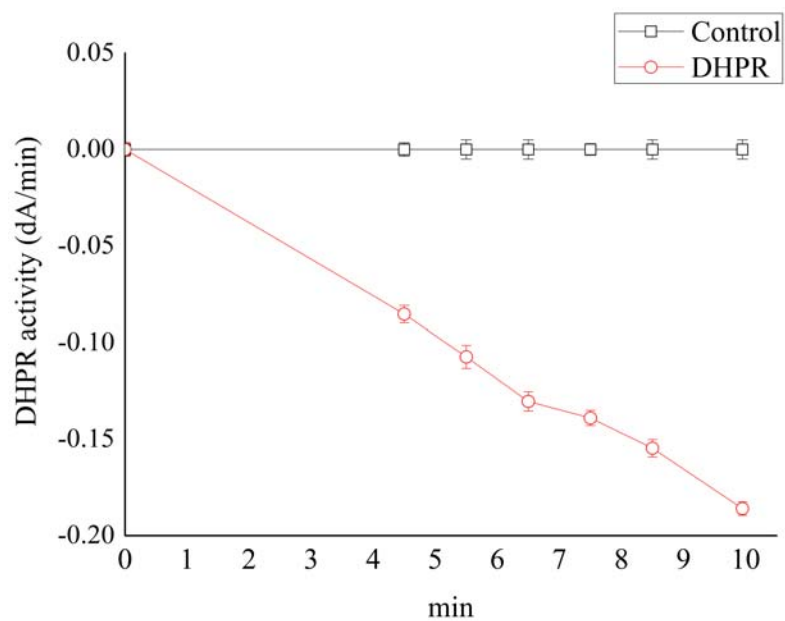

Figure S4. The purified DHPR protein shows DHPR enzyme activity. The open round circle ( $\circ$ ) indicates the addition of a recombinant protein and the open square ( $\square$ ) indicates no addition of protein. The data shown are the averages of three independent experiments.

|     |                                |                  |          |          |                   |               |      |
|-----|--------------------------------|------------------|----------|----------|-------------------|---------------|------|
| 1   | Mortierella alpina PAH-1       | MSAAAMHRCADTSVTP | VKTHHSTI | DKVGDQDC | MAIKAMHLSITRIBRFS | KIADWDYDFYDFM | AYDA |
| 1   | Mortierella alpina PAH-2       | MSSTFCHLHKTDATFT | VKTHHSTA | DKVGDQDC | MAIKAMHLSITRIBRFS | KIADWDYDFYDFM | ATSA |
| 1   | Rhizopus oryzae PAH            |                  |          |          |                   |               |      |
| 1   | Soizellomyces punctatus PAH    |                  |          |          |                   |               |      |
| 1   | Alloomyces macrognus PAH       |                  |          |          |                   |               |      |
| 1   | Phycomyces blakesleeanus PAH   |                  |          |          |                   |               |      |
| 1   | Homo sapiens PAH               |                  |          |          |                   |               |      |
| 1   | Mus musculus PAH               |                  |          |          |                   |               |      |
| 1   | Rattus norvegicus PAH          |                  |          |          |                   |               |      |
| 1   | Drosophila melanogaster PAH    |                  |          |          |                   |               |      |
| 1   | Anopheles gambiae PAH          |                  |          |          |                   |               |      |
| 1   | Chlamydomonas reinhardtii PAH  |                  |          |          |                   |               |      |
| 1   | Physcomitrella patens PAH      |                  |          |          |                   |               |      |
| 1   | Pinus taeda PAH                |                  |          |          |                   |               |      |
| 1   | Dictyostelium discoideum PAH   |                  |          |          |                   |               |      |
| 1   | Caenorhabditis elegans PAH     |                  |          |          |                   |               |      |
| 1   | Mesorhizobium loti PAH         |                  |          |          |                   |               |      |
| 1   | Chromobacterium violaceum PAH  |                  |          |          |                   |               |      |
| 1   | Caulobacter crescentus PAH     |                  |          |          |                   |               |      |
| 1   | Colwellia Psychroerythraea PAH |                  |          |          |                   |               |      |
| 1   | Vibrio cholerae PAH            |                  |          |          |                   |               |      |
| 1   | Kalstonia solanacearum PAH     |                  |          |          |                   |               |      |
| 1   | Pseudomonas aeruginosa PAH     |                  |          |          |                   |               |      |
| 1   | Homo sapiens TPH               |                  |          |          |                   |               |      |
| 1   | Mus musculus TPH               |                  |          |          |                   |               |      |
| 1   | Gallus gallus TPH              |                  |          |          |                   |               |      |
| 1   | Drosophila melanogaster TPH    |                  |          |          |                   |               |      |
| 1   | Mortierella alpina PAH-1       |                  |          |          |                   |               |      |
| 1   | Mortierella alpina PAH-2       |                  |          |          |                   |               |      |
| 1   | Rhizopus oryzae PAH            |                  |          |          |                   |               |      |
| 1   | Soizellomyces punctatus PAH    |                  |          |          |                   |               |      |
| 1   | Alloomyces macrognus PAH       |                  |          |          |                   |               |      |
| 1   | Phycomyces blakesleeanus PAH   |                  |          |          |                   |               |      |
| 1   | Homo sapiens PAH               |                  |          |          |                   |               |      |
| 1   | Mus musculus PAH               |                  |          |          |                   |               |      |
| 1   | Rattus norvegicus PAH          |                  |          |          |                   |               |      |
| 1   | Drosophila melanogaster PAH    |                  |          |          |                   |               |      |
| 1   | Anopheles gambiae PAH          |                  |          |          |                   |               |      |
| 1   | Chlamydomonas reinhardtii PAH  |                  |          |          |                   |               |      |
| 1   | Physcomitrella patens PAH      |                  |          |          |                   |               |      |
| 1   | Pinus taeda PAH                |                  |          |          |                   |               |      |
| 1   | Dictyostelium discoideum PAH   |                  |          |          |                   |               |      |
| 1   | Caenorhabditis elegans PAH     |                  |          |          |                   |               |      |
| 1   | Mesorhizobium loti PAH         |                  |          |          |                   |               |      |
| 1   | Chromobacterium violaceum PAH  |                  |          |          |                   |               |      |
| 1   | Caulobacter crescentus PAH     |                  |          |          |                   |               |      |
| 1   | Colwellia Psychroerythraea PAH |                  |          |          |                   |               |      |
| 1   | Vibrio cholerae PAH            |                  |          |          |                   |               |      |
| 1   | Kalstonia solanacearum PAH     |                  |          |          |                   |               |      |
| 1   | Pseudomonas aeruginosa PAH     |                  |          |          |                   |               |      |
| 1   | Homo sapiens TPH               |                  |          |          |                   |               |      |
| 1   | Mus musculus TPH               |                  |          |          |                   |               |      |
| 1   | Gallus gallus TPH              |                  |          |          |                   |               |      |
| 1   | Drosophila melanogaster TPH    |                  |          |          |                   |               |      |
| 74  | Mortierella alpina PAH-1       |                  |          |          |                   |               |      |
| 77  | Mortierella alpina PAH-2       |                  |          |          |                   |               |      |
| 135 | Rhizopus oryzae PAH            |                  |          |          |                   |               |      |
| 142 | Soizellomyces punctatus PAH    |                  |          |          |                   |               |      |
| 143 | Alloomyces macrognus PAH       |                  |          |          |                   |               |      |
| 144 | Phycomyces blakesleeanus PAH   |                  |          |          |                   |               |      |
| 145 | Homo sapiens PAH               |                  |          |          |                   |               |      |
| 146 | Mus musculus PAH               |                  |          |          |                   |               |      |
| 147 | Rattus norvegicus PAH          |                  |          |          |                   |               |      |
| 148 | Drosophila melanogaster PAH    |                  |          |          |                   |               |      |
| 149 | Anopheles gambiae PAH          |                  |          |          |                   |               |      |
| 150 | Chlamydomonas reinhardtii PAH  |                  |          |          |                   |               |      |
| 151 | Physcomitrella patens PAH      |                  |          |          |                   |               |      |
| 152 | Pinus taeda PAH                |                  |          |          |                   |               |      |
| 153 | Dictyostelium discoideum PAH   |                  |          |          |                   |               |      |
| 154 | Caenorhabditis elegans PAH     |                  |          |          |                   |               |      |
| 155 | Mesorhizobium loti PAH         |                  |          |          |                   |               |      |
| 156 | Chromobacterium violaceum PAH  |                  |          |          |                   |               |      |
| 157 | Caulobacter crescentus PAH     |                  |          |          |                   |               |      |
| 158 | Colwellia Psychroerythraea PAH |                  |          |          |                   |               |      |
| 159 | Vibrio cholerae PAH            |                  |          |          |                   |               |      |
| 160 | Kalstonia solanacearum PAH     |                  |          |          |                   |               |      |
| 161 | Pseudomonas aeruginosa PAH     |                  |          |          |                   |               |      |
| 162 | Homo sapiens TPH               |                  |          |          |                   |               |      |
| 163 | Mus musculus TPH               |                  |          |          |                   |               |      |
| 164 | Gallus gallus TPH              |                  |          |          |                   |               |      |
| 165 | Drosophila melanogaster TPH    |                  |          |          |                   |               |      |



Fig. S5. Multiple amino acid sequence alignment of amino acid hydroxylases from fungi, animal, protist, plant and bacteria. Multiple alignments were performed with the ClustalW program using the BioEdit sequence alignment software. The corresponding nucleotide sequences encoding *M. alpina* PAH has been deposited in the GenBank/EMBL database with Accession No. (JN982953 and JN982954). Accession numbers for the other PAH protein sequences above are: *Rhizopus\_oryzae* (RO3G\_07757.1), *Spizellomyces punctatus* (SPPG\_07026T0), *Allomyces macrogynus* (AMAG\_15797T0), *Phycomyces blakesleeanus* (Jgi|Phybl2|161646), *Homo sapiens* (AAH26251.1), *Mus musculus* (CAA36205.1), *Rattus norvegicus* (AAA41843.1), *Drosophila melanogaster* (AAA69513.1), *Anopheles gambiae* (EAA10731.4), *Chlamydomonas reinhardtii* (HQ003816.1), *Physcomitrella patens* (HQ003815.1), *Pinus taeda* (HQ003814.1), *Dictyostelium discoideum* (EAL67992.1), *Caenorhabditis elegans* (CAA91286.1), *Mesorhizobium loti* (BAB51399.1), *Chromobacterium violaceum* (AAA23115.1), *Caulobacter crescentus* (AAK23591.1), *Colwellia Psychrerythraea* (150261591), *Vibrio cholerae* (AAF96726.1), *Ralstonia solanacearum* (CAD17143.1), and *Pseudomonas aeruginosa* (AAA25936.1). Accession numbers for the TPH protein sequences above are: *Homo sapiens* (AAA67050.1), *Mus musculus* (AAA63401.1), *Gallus gallus* (AAC60036.1), and *Drosophila melanogaster* (AAF47444.1). Accession numbers for the TH protein sequences above are: *Homo sapiens* (AAI04968.1), *Mus musculus* (AAA40434.1), *Gallus gallus* (CAB62388.1), and *Drosophila melanogaster* (CAA53802.1).



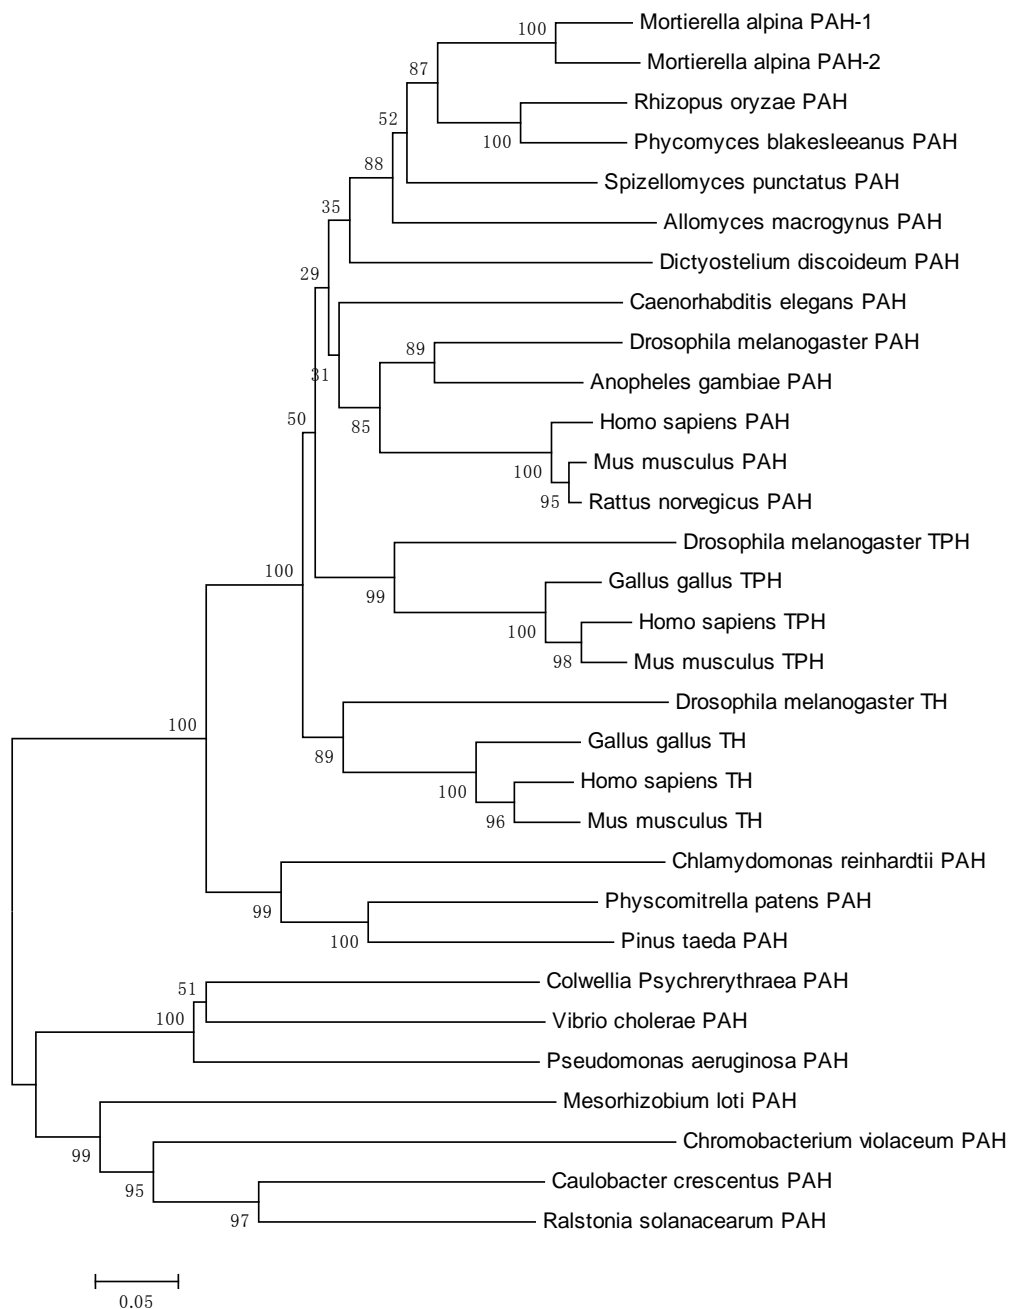

Fig. S6. Phylogenetic tree of amino acid hydroxylases from different organisms (PAH: Phenylalanine hydroxylase; TPH: Tryptophan hydroxylase; TH: Tyrosine hydroxylase). The tree was constructed using the neighbor-joining method with CLUSTAL W NJPLOT. The horizontal branch length is proportional to the amino acid substitution rate per site.

The numbers represent the frequencies with which the tree topology presented here was replicated after 1000 bootstrap iterations.



grisea 70-15(3), *Neurospora crassa* OR74A(7), *Neosartorya fischeri* NRRL 181, *Podospora anserina* DSM 980(6), *Phanerochaete chrysosporium*, *Pichia stipitis* CBS 6054(10), *Saccharomyces bayanus*(14), *Saccharomyces cerevisiae* S288C(9), *Saccharomyces mikatae*(14), *Saccharomyces paradoxus*(14), *Schizosaccharomyces pombe* 972h(23), *Sclerotinia sclerotiorum* 1980 UF-70, *Ustilago maydis* 521(11), *Yarrowia lipolytica* CLIB122(5), *Schizosaccharomyces cryophilus* OY26, *Schizosaccharomyces japonicus* yFS275 and *Schizosaccharomyces octosporus* ATCC4206 (21), and *Vanderwaltozyma polyspora* DSM 70294(22) were published. Genome sequences of *Nectria haematococca* MPVI (*Fusarium solani*) (Joint Genome Institute), *Trichoderma atroviride* P1 (Joint Genome Institute), *Trichoderma virens* Gv29-8 (Joint Genome Institute), *Batrachochytrium dendrobatidis* JAM81 (Joint Genome Institute), *Mucor circinelloides* (Joint Genome Institute), *Trichoderma reese* QM6a (Joint Genome Institute), *Neosartorya fischeri* NRRL 181 (Broad Institute), and *Phytophthora infestans* T30-4 (Broad Institute) were downloaded from the corresponding websites.

Table. S2. The status of fatty acids in *M. alpina* and *A. oryza* grown on PAH inhibitor medium<sup>a</sup>

| Medium                                  | Cell dry weight (CDW) (g/L) | Cell lipid (mg/g CDW) | SAFA     |          |          |          |         |         | MUFA |         |            |          |           |         |      |         |
|-----------------------------------------|-----------------------------|-----------------------|----------|----------|----------|----------|---------|---------|------|---------|------------|----------|-----------|---------|------|---------|
|                                         |                             |                       | 14:0     | 16:0     | 18:0     | 20:0     | 22:0    | 24:0    | 14:1 | 16:1    | total 18:1 | oleate   | vaccenate | 20:1    | 22:1 | 24:1    |
| Inhibitor ( <i>M. alpina</i> )          | 5.3±0.2                     | 24.1±1.3              | 2.4±0.1  | 18.5±1.1 | 8.7±0.6  | 0.5±0.1  | 1.4±0.2 | 2.9±0.1 |      | 0.1±0.0 | 24.2±1.4   | 23.8±1.2 | 0.4±0.1   | 0.8±0.1 |      | 0.2±0.0 |
| Inhibitor+Tyrosine ( <i>M. alpina</i> ) | 5.1±0.2                     | 24.2±1.2              | 2.2±0.1  | 19.7±0.9 | 7.9±0.3  | 0.5±0.1  | 1.6±0.2 | 4.2±0.2 |      | 0.1±0.0 | 24.9±1.3   | 24.5±1.2 | 0.4±0.1   | 0.7±0.1 |      | 0.1±0.0 |
| Control ( <i>M. alpina</i> )            | 6.6±0.2                     | 35.5±1.5              | 1.3±0.1  | 16.2±1.5 | 11.0±0.8 | 0.6±0.1  | 1.3±0.1 | 1.9±0.1 |      | 0.1±0.0 | 11.7±1.8   | 11.4±1.6 | 0.3±0.0   | 0.3±0.0 |      | 0.2±0.0 |
| Inhibitor ( <i>A. oryzae</i> )          | 7.0±0.2                     | 11.6±0.2              | 0.4±0.0  | 11.8±0.3 | 15.4±0.5 | 0.4±0.0  | 0.4±0.0 | 2.2±0.1 |      | 0.3±0.0 | 20.7±1.0   | 20.6±1.0 | 0.1±0.0   | 0.1±0.0 |      |         |
| Control ( <i>A. oryzae</i> )            | 7.3±0.3                     | 11.2±0.2              | 0.4±0.0  | 11.7±0.2 | 14.8±0.8 | 0.4±0.0  | 0.4±0.0 | 2.1±0.1 |      | 0.3±0.0 | 21.2±1.2   | 21.1±1.2 | 0.1±0.0   | 0.1±0.0 |      |         |
| Medium                                  | ω6 PUFA                     |                       |          |          |          | ω3 PUFA  |         |         |      |         |            |          |           |         |      |         |
|                                         | 18:2                        | 20:2                  | 18:3 n-6 | 20:3     | 20:4     | 18:3 n-3 | 20:5    | 22:5    | 22:6 | 24:5    | 24:6       |          |           |         |      |         |
| Inhibitor ( <i>M. alpina</i> )          | 18.8±1.2                    | 0.7±0.1               |          |          | 20.8±0.8 |          | 0.1±0.0 |         |      |         |            |          |           |         |      |         |
| Inhibitor+Tyrosine ( <i>M. alpina</i> ) | 19.1±0.9                    | 0.6±0.1               |          |          | 18.1±0.7 |          | 0.1±0.0 |         |      |         |            |          |           |         |      |         |
| Control ( <i>M. alpina</i> )            | 20.8±1.7                    | 0.8±0.1               |          |          | 33.9±2.1 |          | 0.1±0.0 |         |      |         |            |          |           |         |      |         |
| Inhibitor ( <i>A. oryzae</i> )          | 46.7±2.3                    | 0.1±0.0               |          |          |          | 1.5±0.1  |         |         |      |         |            |          |           |         |      |         |
| Control ( <i>A. oryzae</i> )            | 47.0±2.0                    | 0.1±0.0               |          |          |          | 1.5±0.1  |         |         |      |         |            |          |           |         |      |         |

<sup>a</sup>Molar percent of each fatty acid in day 6 mycelia. 14:0 myristic acid (tetradecanoic acid), 14:1 myristoleic acid (tetradecenoic acid), 16:0 palmitic acid (hexadecanoic acid), 16:1 palmitoleic acid (hexadecenoic acid), 18:0 stearic acid (octadecanoic acid), 18:1 oleic acid (9Z-octadecenoic acid) and vaccenic acid (11Z-octadecenoic acid), 18:2 linoleic acid (octadecadienoic acid), 18:3 α-linolenic acid (9Z,12Z,15Zoctadecatrienoic acid) and γ-linolenic acid (6Z,9Z,12Z-octadecatrienoic acid), 20:0 arachidic acid (eicosanoic acid), 20:1 gondoic acid (eicosenoic acid), 20:2 (Eicosadienoic acid), 20:3 dihomo-γ-linolenic acid (eicosatrienoic acid), 20:4 arachidonic acid (eicosatetraenoic acid), 20:5 EPA (eicosapentaenoic acid), 22:0 behenic acid (docosanoic acid), 22:1 erucic acid

(docosenoic acid), 22:5 DPA (docosapentaenoic acid), 22:6 DHA (docosahexaenoic acid), 24:0 lignoceric acid (tetracosanoic acid), 24:1 nervonic acid (tetracosenoic acid), 24:5 (tetracosapentaenoic acid), and 24:6 (tetracosahexaenoic acid). The data shown are the averages of three independent experiments.

## Reference

1. Braun, B. R., M. van Het Hoog, C. d'Enfert, M. Martchenko, J. Dungan, A. Kuo, D. O. Inglis, M. A. Uhl, H. Hogues, M. Berriman, M. Lorenz, A. Levitin, U. Oberholzer, C. Bachewich, D. Marcus, A. Marcil, D. Dignard, T. Iouk, R. Zito, L. Frangeul, F. Tekaiia, K. Rutherford, E. Wang, C. A. Munro, S. Bates, N. A. Gow, L. L. Hoyer, G. Kohler, J. Morschhauser, G. Newport, S. Znaidi, M. Raymond, B. Turcotte, G. Sherlock, M. Costanzo, J. Ihmels, J. Berman, D. Sanglard, N. Agabian, A. P. Mitchell, A. D. Johnson, M. Whiteway, and A. Nantel. 2005. A human-curated annotation of the *Candida albicans* genome. *PLoS Genet* 1:36-57.
2. Cuomo, C. A., U. Guldener, J. R. Xu, F. Trail, B. G. Turgeon, A. Di Pietro, J. D. Walton, L. J. Ma, S. E. Baker, M. Rep, G. Adam, J. Antoniw, T. Baldwin, S. Calvo, Y. L. Chang, D. Decaprio, L. R. Gale, S. Gnerre, R. S. Goswami, K. Hammond-Kosack, L. J. Harris, K. Hilburn, J. C. Kennell, S. Kroken, J. K. Magnuson, G. Mannhaupt, E. Mauceli, H. W. Mewes, R. Mitterbauer, G. Muehlbauer, M. Munsterkotter, D. Nelson, K. O'Donnell, T. Ouellet, W. Qi, H. Quesneville, M. I. Roncero, K. Y. Seong, I. V. Tetko, M. Urban, C. Waalwijk, T. J. Ward, J. Yao, B. W. Birren, and H. C. Kistler. 2007. The *Fusarium graminearum* genome reveals a link between localized polymorphism and pathogen specialization. *Science* 317:1400-2.
3. Dean, R. A., N. J. Talbot, D. J. Ebbole, M. L. Farman, T. K. Mitchell, M. J. Orbach, M. Thon, R. Kulkarni, J. R. Xu, H. Pan, N. D. Read, Y. H. Lee, I. Carbone, D. Brown, Y. Y. Oh, N. Donofrio, J. S. Jeong, D. M. Soanes, S. Djonovic, E. Kolomiets, C. Rehmeier, W. Li, M. Harding, S. Kim, M. H. Lebrun, H. Bohnert, S. Coughlan, J. Butler, S. Calvo, L. J. Ma, R. Nicol, S. Purcell, C. Nusbaum, J. E. Galagan, and B. W. Birren. 2005. The genome sequence of the rice blast fungus *Magnaporthe grisea*. *Nature* 434:980-6.
4. Dietrich, F. S., S. Voegeli, S. Brachat, A. Lerch, K. Gates, S. Steiner, C. Mohr, R. Pohlmann, P. Luedi, S. Choi, R. A. Wing, A. Flavier, T. D. Gaffney, and P. Philippsen. 2004. The *Ashbya gossypii* genome as a tool for mapping the ancient *Saccharomyces cerevisiae* genome. *Science* 304:304-7.
5. Dujon, B., D. Sherman, G. Fischer, P. Durrens, S. Casaregola, I. Lafontaine, J. De Montigny, C. Marck, C. Neugeglise, E. Talla, N. Goffard, L. Frangeul, M. Aigle, V. Anthouard, A. Babour, V. Barbe, S. Barnay, S. Blanchin, J. M. Beckerich, E. Beyne, C. Bleykasten, A. Boisrame, J. Boyer, L. Cattolico, F. Confanioleri, A. De Daruvar, L. Despons, E. Fabre, C. Fairhead, H. Ferry-Dumazet, A. Groppi, F. Hantraye, C. Hennequin, N. Jauniaux, P. Joyet, R. Kachouri, A. Kerrest, R. Koszul, M. Lemaire, I. Lesur, L. Ma, H. Muller, J. M. Nicaud, M. Nikolski, S. Oztas, O. Ozier-Kalogeropoulos, S. Pellenz, S. Potier, G. F. Richard, M. L. Straub, A. Suleau, D. Swennen, F. Tekaiia, M. Wesolowski-Louvel, E. Westhof, B. Wirth, M. Zeniou-Meyer, I. Zivanovic, M. Bolotin-Fukuhara, A. Thierry, C. Bouchier, B. Caudron, C. Scarpelli, C. Gaillardin, J. Weissenbach, P. Wincker, and J. L. Souciet. 2004. Genome evolution in yeasts. *Nature* 430:35-44.
6. Espagne, E., O. Lespinet, F. Malagnac, C. Da Silva, O. Jaillon, B. M. Porcel, A. Couloux, J. M. Aury, B. Segurens, J. Poulain, V. Anthouard, S. Grossetete, H.

- Khalili, E. Coppin, M. Dequard-Chablat, M. Picard, V. Contamine, S. Arnaise, A. Bourdais, V. Berteaux-Lecellier, D. Gautheret, R. P. de Vries, E. Battaglia, P. M. Coutinho, E. G. Danchin, B. Henrissat, R. E. Khoury, A. Sainsard-Chanet, A. Boivin, B. Pinan-Lucarre, C. H. Sellem, R. Debuchy, P. Wincker, J. Weissenbach, and P. Silar. 2008. The genome sequence of the model ascomycete fungus *Podospira anserina*. *Genome Biol* **9**:R77.
7. Galagan, J. E., S. E. Calvo, K. A. Borkovich, E. U. Selker, N. D. Read, D. Jaffe, W. FitzHugh, L. J. Ma, S. Smirnov, S. Purcell, B. Rehman, T. Elkins, R. Engels, S. Wang, C. B. Nielsen, J. Butler, M. Endrizzi, D. Qui, P. Ianakiev, D. Bell-Pedersen, M. A. Nelson, M. Werner-Washburne, C. P. Selitrennikoff, J. A. Kinsey, E. L. Braun, A. Zelter, U. Schulte, G. O. Kothe, G. Jedd, W. Mewes, C. Staben, E. Marcotte, D. Greenberg, A. Roy, K. Foley, J. Naylor, N. Stange-Thomann, R. Barrett, S. Gnerre, M. Kamal, M. Kamvysselis, E. Mauceli, C. Bielke, S. Rudd, D. Frishman, S. Krystofova, C. Rasmussen, R. L. Metzenberg, D. D. Perkins, S. Kroken, C. Cogoni, G. Macino, D. Catcheside, W. Li, R. J. Pratt, S. A. Osmani, C. P. DeSouza, L. Glass, M. J. Orbach, J. A. Berglund, R. Voelker, O. Yarden, M. Plamann, S. Seiler, J. Dunlap, A. Radford, R. Aramayo, D. O. Natvig, L. A. Alex, G. Mannhaupt, D. J. Ebbole, M. Freitag, I. Paulsen, M. S. Sachs, E. S. Lander, C. Nusbaum, and B. Birren. 2003. The genome sequence of the filamentous fungus *Neurospora crassa*. *Nature* **422**:859-68.
  8. Galagan, J. E., S. E. Calvo, C. Cuomo, L. J. Ma, J. R. Wortman, S. Batzoglou, S. I. Lee, M. Basturkmen, C. C. Spevak, J. Clutterbuck, V. Kapitonov, J. Jurka, C. Scaccocchio, M. Farman, J. Butler, S. Purcell, S. Harris, G. H. Braus, O. Draht, S. Busch, C. D'Enfert, C. Bouchier, G. H. Goldman, D. Bell-Pedersen, S. Griffiths-Jones, J. H. Doonan, J. Yu, K. Vienken, A. Pain, M. Freitag, E. U. Selker, D. B. Archer, M. A. Penalva, B. R. Oakley, M. Momany, T. Tanaka, T. Kumagai, K. Asai, M. Machida, W. C. Nierman, D. W. Denning, M. Caddick, M. Hynes, M. Paoletti, R. Fischer, B. Miller, P. Dyer, M. S. Sachs, S. A. Osmani, and B. W. Birren. 2005. Sequencing of *Aspergillus nidulans* and comparative analysis with *A. fumigatus* and *A. oryzae*. *Nature* **438**:1105-15.
  9. Goffeau, A., B. G. Barrell, H. Bussey, R. W. Davis, B. Dujon, H. Feldmann, F. Galibert, J. D. Hoheisel, C. Jacq, M. Johnston, E. J. Louis, H. W. Mewes, Y. Murakami, P. Philippsen, H. Tettelin, and S. G. Oliver. 1996. Life with 6000 genes. *Science* **274**:546, 563-7.
  10. Jeffries, T. W., I. V. Grigoriev, J. Grimwood, J. M. Laplaza, A. Aerts, A. Salamov, J. Schmutz, E. Lindquist, P. Dehal, H. Shapiro, Y. S. Jin, V. Passoth, and P. M. Richardson. 2007. Genome sequence of the lignocellulose-bioconverting and xylose-fermenting yeast *Pichia stipitis*. *Nat Biotechnol* **25**:319-26.
  11. Kamper, J., R. Kahmann, M. Bolker, L. J. Ma, T. Brefort, B. J. Saville, F. Banuett, J. W. Kronstad, S. E. Gold, O. Muller, M. H. Perlin, H. A. Wosten, R. de Vries, J. Ruiz-Herrera, C. G. Reynaga-Pena, K. Snetselaar, M. McCann, J. Perez-Martin, M. Feldbrugge, C. W. Basse, G. Steinberg, J. I. Ibeas, W. Holloman, P. Guzman, M. Farman, J. E. Stajich, R. Sentandreu, J. M. Gonzalez-Prieto, J. C. Kennell, L. Molina, J. Schirawski, A. Mendoza-Mendoza, D. Greilinger, K. Munch, N. Rossel, M. Scherer, M. Vranes, O. Ladendorf, V. Vincon, U. Fuchs, B. Sandrock, S. Meng, E. C. Ho, M. J. Cahill, K. J. Boyce, J.



- Klose, S. J. Klosterman, H. J. Deelstra, L. Ortiz-Castellanos, W. Li, P. Sanchez-Alonso, P. H. Schreier, I. Hauser-Hahn, M. Vaupel, E. Koopmann, G. Friedrich, H. Voss, T. Schluter, J. Margolis, D. Platt, C. Swimmer, A. Gnirke, F. Chen, V. Vysotskaia, G. Mannhaupt, U. Guldener, M. Munsterkotter, D. Haase, M. Oesterheld, H. W. Mewes, E. W. Mauceli, D. DeCaprio, C. M. Wade, J. Butler, S. Young, D. B. Jaffe, S. Calvo, C. Nusbaum, J. Galagan, and B. W. Birren. 2006. Insights from the genome of the biotrophic fungal plant pathogen *Ustilago maydis*. *Nature* **444**:97-101.
12. Katinka, M. D., S. Duprat, E. Cornillot, G. Metenier, F. Thomarat, G. Prensier, V. Barbe, E. Peyretailade, P. Brottier, P. Wincker, F. Delbac, H. El Alaoui, P. Peyret, W. Saurin, M. Gouy, J. Weissenbach, and C. P. Vivares. 2001. Genome sequence and gene compaction of the eukaryote parasite *Encephalitozoon cuniculi*. *Nature* **414**:450-3.
  13. Kellis, M., B. W. Birren, and E. S. Lander. 2004. Proof and evolutionary analysis of ancient genome duplication in the yeast *Saccharomyces cerevisiae*. *Nature* **428**:617-24.
  14. Kellis, M., N. Patterson, M. Endrizzi, B. Birren, and E. S. Lander. 2003. Sequencing and comparison of yeast species to identify genes and regulatory elements. *Nature* **423**:241-54.
  15. Loftus, B. J., E. Fung, P. Roncaglia, D. Rowley, P. Amedeo, D. Bruno, J. Vamathevan, M. Miranda, I. J. Anderson, J. A. Fraser, J. E. Allen, I. E. Bosdet, M. R. Brent, R. Chiu, T. L. Doering, M. J. Donlin, C. A. D'Souza, D. S. Fox, V. Grinberg, J. Fu, M. Fukushima, B. J. Haas, J. C. Huang, G. Janbon, S. J. Jones, H. L. Koo, M. I. Krzywinski, J. K. Kwon-Chung, K. B. Lengeler, R. Maiti, M. A. Marra, R. E. Marra, C. A. Mathewson, T. G. Mitchell, M. Pertea, F. R. Riggs, S. L. Salzberg, J. E. Schein, A. Shvartsbeyn, H. Shin, M. Shumway, C. A. Specht, B. B. Suh, A. Tenney, T. R. Utterback, B. L. Wickes, J. R. Wortman, N. H. Wye, J. W. Kronstad, J. K. Lodge, J. Heitman, R. W. Davis, C. M. Fraser, and R. W. Hyman. 2005. The genome of the basidiomycetous yeast and human pathogen *Cryptococcus neoformans*. *Science* **307**:1321-4.
  16. Ma, L. J., A. S. Ibrahim, C. Skory, M. G. Grabherr, G. Burger, M. Butler, M. Elias, A. Idnurm, B. F. Lang, T. Sone, A. Abe, S. E. Calvo, L. M. Corrochano, R. Engels, J. Fu, W. Hansberg, J. M. Kim, C. D. Kodira, M. J. Koehrsen, B. Liu, D. Miranda-Saavedra, S. O'Leary, L. Ortiz-Castellanos, R. Poulter, J. Rodriguez-Romero, J. Ruiz-Herrera, Y. Q. Shen, Q. Zeng, J. Galagan, B. W. Birren, C. A. Cuomo, and B. L. Wickes. 2009. Genomic analysis of the basal lineage fungus *Rhizopus oryzae* reveals a whole-genome duplication. *PLoS Genet* **5**:e1000549.
  17. Machida, M., K. Asai, M. Sano, T. Tanaka, T. Kumagai, G. Terai, K. Kusumoto, T. Arima, O. Akita, Y. Kashiwagi, K. Abe, K. Gomi, H. Horiuchi, K. Kitamoto, T. Kobayashi, M. Takeuchi, D. W. Denning, J. E. Galagan, W. C. Nierman, J. Yu, D. B. Archer, J. W. Bennett, D. Bhatnagar, T. E. Cleveland, N. D. Fedorova, O. Gotoh, H. Horikawa, A. Hosoyama, M. Ichinomiya, R. Igarashi, K. Iwashita, P. R. Juvvadi, M. Kato, Y. Kato, T. Kin, A. Kokubun, H. Maeda, N. Maeyama, J. Maruyama, H. Nagasaki, T. Nakajima, K. Oda, K. Okada, I. Paulsen, K. Sakamoto, T. Sawano, M. Takahashi, K. Takase, Y. Terabayashi, J. R. Wortman, O. Yamada, Y. Yamagata, H. Anazawa, Y. Hata, Y. Koide, T.

- Komori, Y. Koyama, T. Minetoki, S. Suharnan, A. Tanaka, K. Isono, S. Kuhara, N. Ogasawara, and H. Kikuchi. 2005. Genome sequencing and analysis of *Aspergillus oryzae*. *Nature* **438**:1157-61.
18. Martin, F., A. Aerts, D. Ahren, A. Brun, E. G. Danchin, F. Duchaussoy, J. Gibon, A. Kohler, E. Lindquist, V. Pereda, A. Salamov, H. J. Shapiro, J. Wuyts, D. Blaudez, M. Buee, P. Brokstein, B. Canback, D. Cohen, P. E. Courty, P. M. Coutinho, C. Delaruelle, J. C. Detter, A. Deveau, S. DiFazio, S. Duplessis, L. Fraissinet-Tachet, E. Lucic, P. Frey-Klett, C. Fourrey, I. Feussner, G. Gay, J. Grimwood, P. J. Hoegger, P. Jain, S. Kilaru, J. Labbe, Y. C. Lin, V. Legue, F. Le Tacon, R. Marmeisse, D. Melayah, B. Montanini, M. Muratet, U. Nehls, H. Niculita-Hirzel, M. P. Oudot-Le Secq, M. Peter, H. Quesneville, B. Rajashekar, M. Reich, N. Rouhier, J. Schmutz, T. Yin, M. Chalot, B. Henrissat, U. Kues, S. Lucas, Y. Van de Peer, G. K. Podila, A. Polle, P. J. Pukkila, P. M. Richardson, P. Rouze, I. R. Sanders, J. E. Stajich, A. Tunlid, G. Tuskan, and I. V. Grigoriev. 2008. The genome of *Laccaria bicolor* provides insights into mycorrhizal symbiosis. *Nature* **452**:88-92.
19. Nierman, W. C., A. Pain, M. J. Anderson, J. R. Wortman, H. S. Kim, J. Arroyo, M. Berriman, K. Abe, D. B. Archer, C. Bermejo, J. Bennett, P. Bowyer, D. Chen, M. Collins, R. Coulsen, R. Davies, P. S. Dyer, M. Farman, N. Fedorova, T. V. Feldblyum, R. Fischer, N. Fosker, A. Fraser, J. L. Garcia, M. J. Garcia, A. Goble, G. H. Goldman, K. Gomi, S. Griffith-Jones, R. Gwilliam, B. Haas, H. Haas, D. Harris, H. Horiuchi, J. Huang, S. Humphray, J. Jimenez, N. Keller, H. Khouri, K. Kitamoto, T. Kobayashi, S. Konzack, R. Kulkarni, T. Kumagai, A. Lafon, J. P. Latge, W. Li, A. Lord, C. Lu, W. H. Majoros, G. S. May, B. L. Miller, Y. Mohamoud, M. Molina, M. Monod, I. Mouyna, S. Mulligan, L. Murphy, S. O'Neil, I. Paulsen, M. A. Penalva, M. Pertea, C. Price, B. L. Pritchard, M. A. Quail, E. Rabinowitsch, N. Rawlins, M. A. Rajandream, U. Reichard, H. Renault, G. D. Robson, S. Rodriguez de Cordoba, J. M. Rodriguez-Pena, C. M. Ronning, S. Rutter, S. L. Salzberg, M. Sanchez, J. C. Sanchez-Ferrero, D. Saunders, K. Seeger, R. Squares, S. Squares, M. Takeuchi, F. Tekaiia, G. Turner, C. R. Vazquez de Aldana, J. Weidman, O. White, J. Woodward, J. H. Yu, C. Fraser, J. E. Galagan, K. Asai, M. Machida, N. Hall, B. Barrell, and D. W. Denning. 2005. Genomic sequence of the pathogenic and allergenic filamentous fungus *Aspergillus fumigatus*. *Nature* **438**:1151-6.
20. Pel, H. J., J. H. de Winde, D. B. Archer, P. S. Dyer, G. Hofmann, P. J. Schaap, G. Turner, R. P. de Vries, R. Albang, K. Albermann, M. R. Andersen, J. D. Bendtsen, J. A. Benen, M. van den Berg, S. Breestraat, M. X. Caddick, R. Contreras, M. Cornell, P. M. Coutinho, E. G. Danchin, A. J. Debets, P. Dekker, P. W. van Dijck, A. van Dijk, L. Dijkhuizen, A. J. Driessen, C. d'Enfert, S. Geysens, C. Goosen, G. S. Groot, P. W. de Groot, T. Guillemette, B. Henrissat, M. Herweijer, J. P. van den Hombergh, C. A. van den Hondel, R. T. van der Heijden, R. M. van der Kaaij, F. M. Klis, H. J. Kools, C. P. Kubicek, P. A. van Kuyk, J. Lauber, X. Lu, M. J. van der Maarel, R. Meulenberg, H. Menke, M. A. Mortimer, J. Nielsen, S. G. Oliver, M. Olsthoorn, K. Pal, N. N. van Peij, A. F. Ram, U. Rinas, J. A. Roubos, C. M. Sagt, M. Schmoll, J. Sun, D. Ussery, J. Varga, W. Vervecken, P. J. van de Vondervoort, H. Wedler, H. A. Wosten, A. P. Zeng, A. J. van Ooyen,

- J. Visser, and H. Stam.** 2007. Genome sequencing and analysis of the versatile cell factory *Aspergillus niger* CBS 513.88. *Nat Biotechnol* **25**:221-31.
21. **Rhind, N., Z. Chen, M. Yassour, D. A. Thompson, B. J. Haas, N. Habib, I. Wapinski, S. Roy, M. F. Lin, D. I. Heiman, S. K. Young, K. Furuya, Y. Guo, A. Pidoux, H. M. Chen, B. Robbertse, J. M. Goldberg, K. Aoki, E. H. Bayne, A. M. Berlin, C. A. Desjardins, E. Dobbs, L. Dukaj, L. Fan, M. G. FitzGerald, C. French, S. Gujja, K. Hansen, D. Keifenheim, J. Z. Levin, R. A. Mosher, C. A. Muller, J. Pfiffner, M. Priest, C. Russ, A. Smialowska, P. Swoboda, S. M. Sykes, M. Vaughn, S. Vengrova, R. Yoder, Q. Zeng, R. Allshire, D. Baulcombe, B. W. Birren, W. Brown, K. Ekwall, M. Kellis, J. Leatherwood, H. Levin, H. Margalit, R. Martienssen, C. A. Nieduszynski, J. W. Spatafora, N. Friedman, J. Z. Dalgaard, P. Baumann, H. Niki, A. Regev, and C. Nusbaum.** 2011. Comparative functional genomics of the fission yeasts. *Science* **332**:930-6.
22. **Scannell, D. R., A. C. Frank, G. C. Conant, K. P. Byrne, M. Woolfit, and K. H. Wolfe.** 2007. Independent sorting-out of thousands of duplicated gene pairs in two yeast species descended from a whole-genome duplication. *Proc Natl Acad Sci U S A* **104**:8397-402.
23. **Wood, V., R. Gwilliam, M. A. Rajandream, M. Lyne, R. Lyne, A. Stewart, J. Sgouros, N. Peat, J. Hayles, S. Baker, D. Basham, S. Bowman, K. Brooks, D. Brown, S. Brown, T. Chillingworth, C. Churcher, M. Collins, R. Connor, A. Cronin, P. Davis, T. Feltwell, A. Fraser, S. Gentles, A. Goble, N. Hamlin, D. Harris, J. Hidalgo, G. Hodgson, S. Holroyd, T. Hornsby, S. Howarth, E. J. Huckle, S. Hunt, K. Jagels, K. James, L. Jones, M. Jones, S. Leather, S. McDonald, J. McLean, P. Mooney, S. Moule, K. Mungall, L. Murphy, D. Niblett, C. Odell, K. Oliver, S. O'Neil, D. Pearson, M. A. Quail, E. Rabinowitsch, K. Rutherford, S. Rutter, D. Saunders, K. Seeger, S. Sharp, J. Skelton, M. Simmonds, R. Squares, S. Squares, K. Stevens, K. Taylor, R. G. Taylor, A. Tivey, S. Walsh, T. Warren, S. Whitehead, J. Woodward, G. Volckaert, R. Aert, J. Robben, B. Grymonprez, I. Weltjens, E. Vanstreels, M. Rieger, M. Schafer, S. Muller-Auer, C. Gabel, M. Fuchs, A. Dusterhoft, C. Fritzc, E. Holzer, D. Moestl, H. Hilbert, K. Borzym, I. Langer, A. Beck, H. Lehrach, R. Reinhardt, T. M. Pohl, P. Eger, W. Zimmermann, H. Wedler, R. Wambutt, B. Purnelle, A. Goffeau, E. Cadieu, S. Dreano, S. Gloux, et al.** 2002. The genome sequence of *Schizosaccharomyces pombe*. *Nature* **415**:871-80.
24. **Xu, J., C. W. Saunders, P. Hu, R. A. Grant, T. Boekhout, E. E. Kuramae, J. W. Kronstad, Y. M. Deangelis, N. L. Reeder, K. R. Johnstone, M. Leland, A. M. Fieno, W. M. Begley, Y. Sun, M. P. Lacey, T. Chaudhary, T. Keough, L. Chu, R. Sears, B. Yuan, and T. L. Dawson, Jr.** 2007. Dandruff-associated *Malassezia* genomes reveal convergent and divergent virulence traits shared with plant and human fungal pathogens. *Proc Natl Acad Sci U S A* **104**:18730-5.
